# Supplementary material
Source: PubMed Central journal article supplement (PMC3948307)
Supplement: 1302078110_pnas.201302078SI.pdf [file 1302078110_pnas.201302078SI.pdf]

# Supporting Information

Dankers et al. 10.1073/pnas.1302078110

Change in GEV 30-year return level in 2070-2099 vs 1971-2000 for gfdl-esm2m

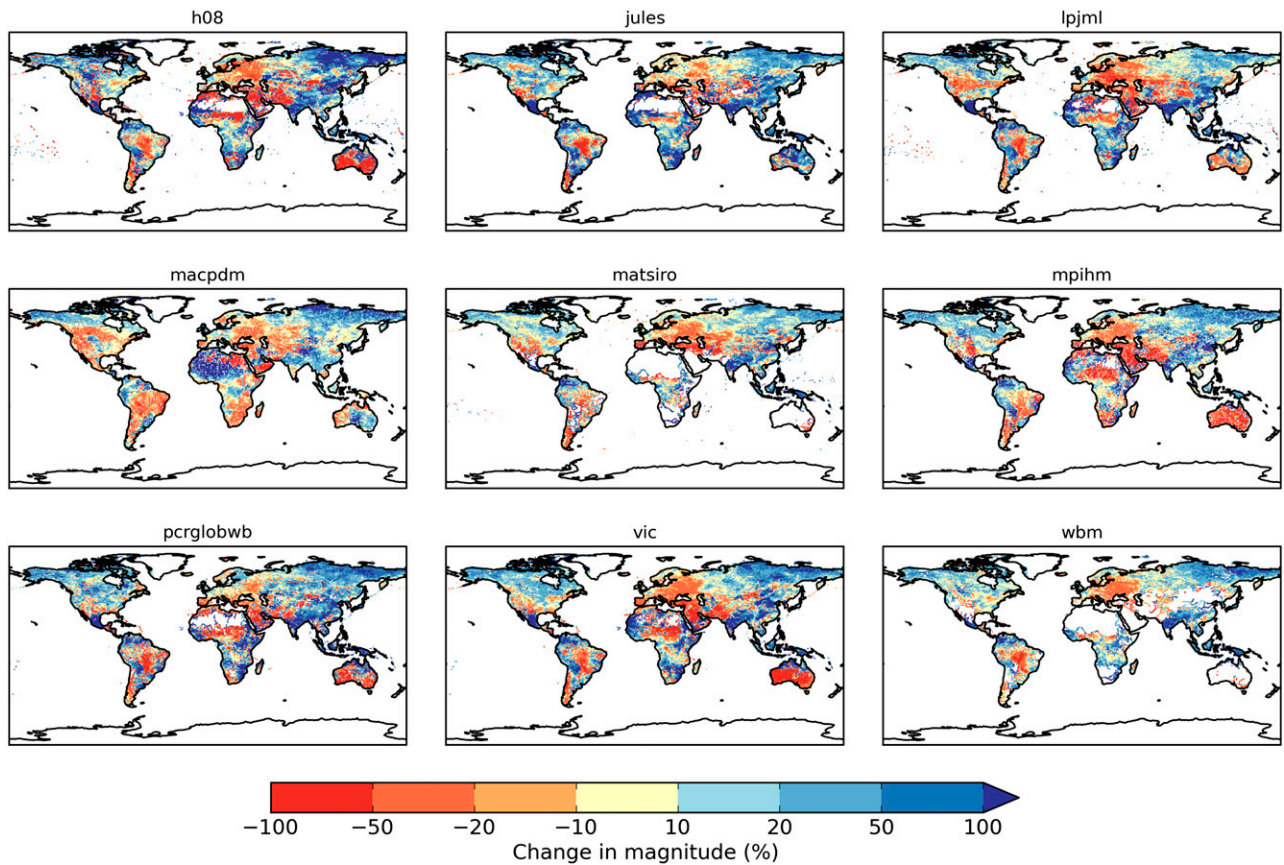

Fig. S1. Change in the magnitude of 30-y return level of river flow (Q30) under future climate conditions (2070–2099; representative concentrations pathway RCP8.5) for GFDL-ESM2M simulations (for full names of the models see Table 1).

Change in GEV 30-year return level in 2070-2099 vs 1971-2000 for hadgem2-es

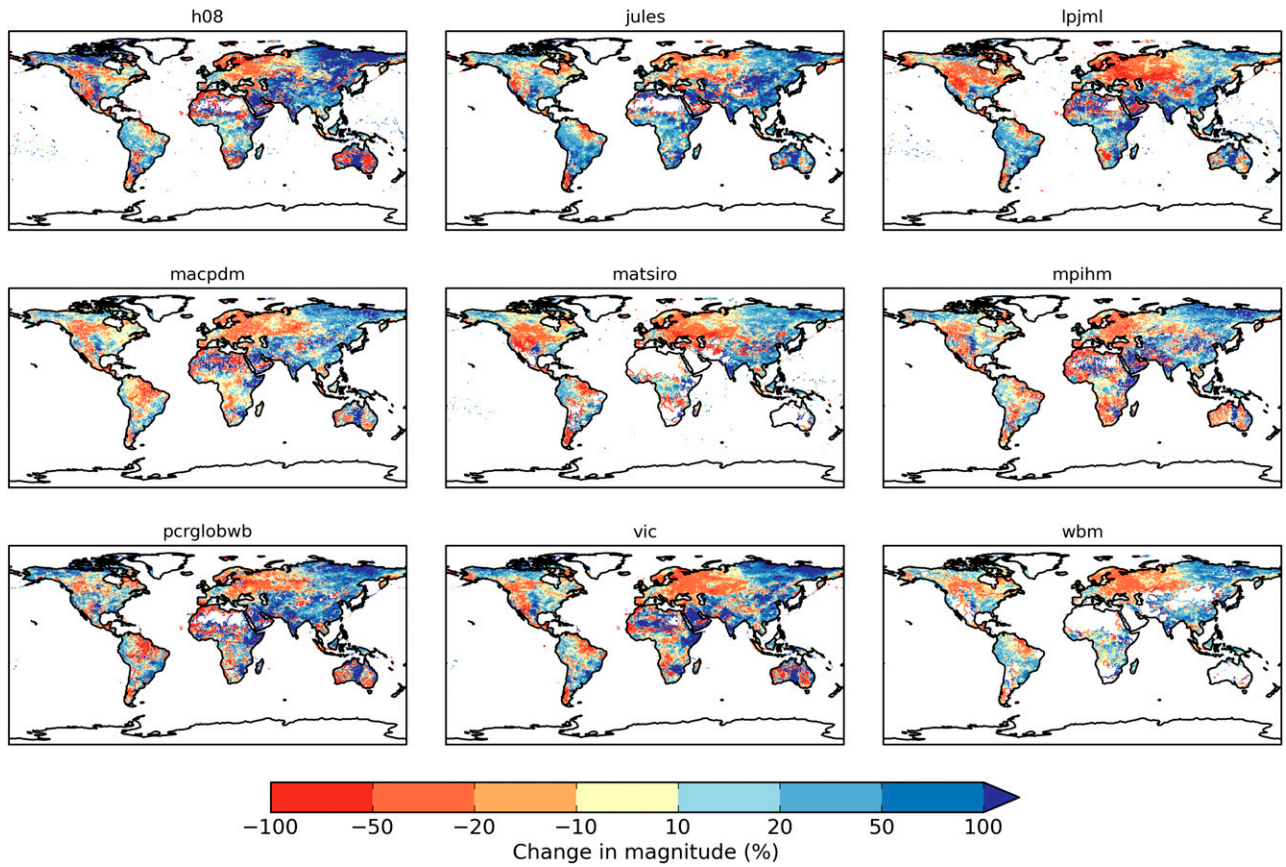

Fig. S2. Change in the magnitude of Q30 under future climate conditions (2070–2099; RCP8.5) for HadGEM2-ES simulations.

Change in GEV 30-year return level in 2070-2099 vs 1971-2000 for ipsl-cm5a-lr

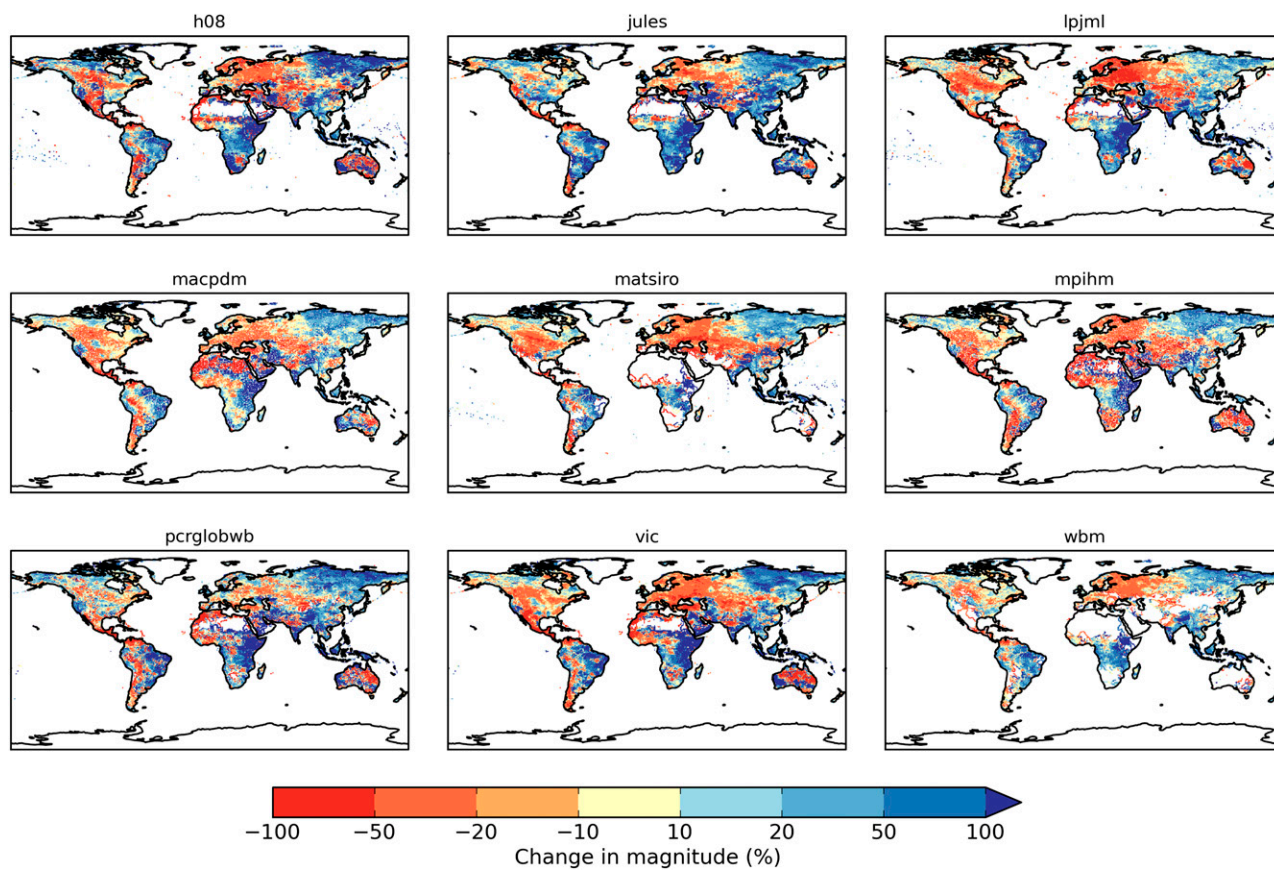

Fig. S3. Change in the magnitude of Q30 under future climate conditions (2070–2099; RCP8.5) for IPSL-CM5A-LR simulations.

Change in GEV 30-year return level in 2070-2099 vs 1971-2000 for miroc-esm-chem

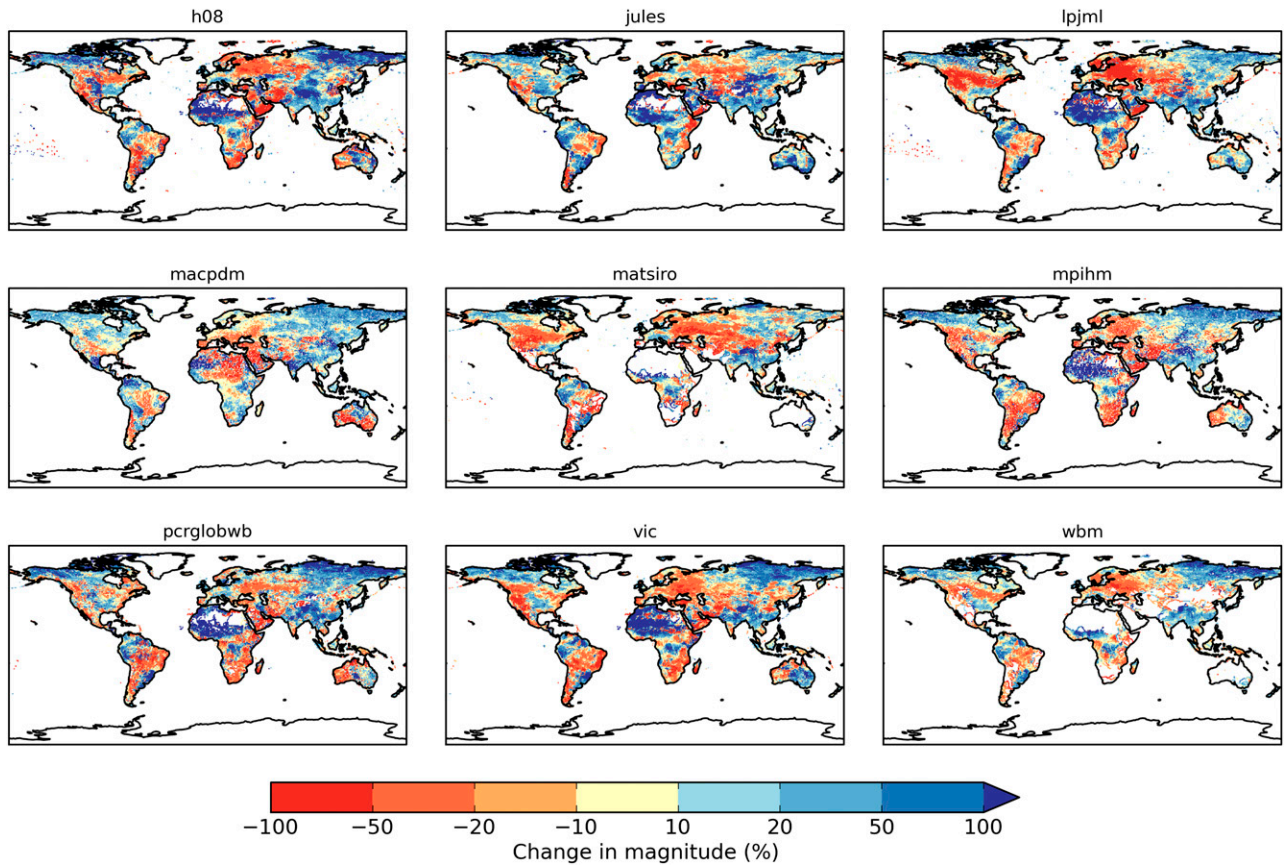

Fig. S4. Change in the magnitude of Q30 under future climate conditions (2070–2099; RCP8.5) for MIROC-ESM-CHEM simulations.

Change in GEV 30-year return level in 2070-2099 vs 1971-2000 for noresm1-m

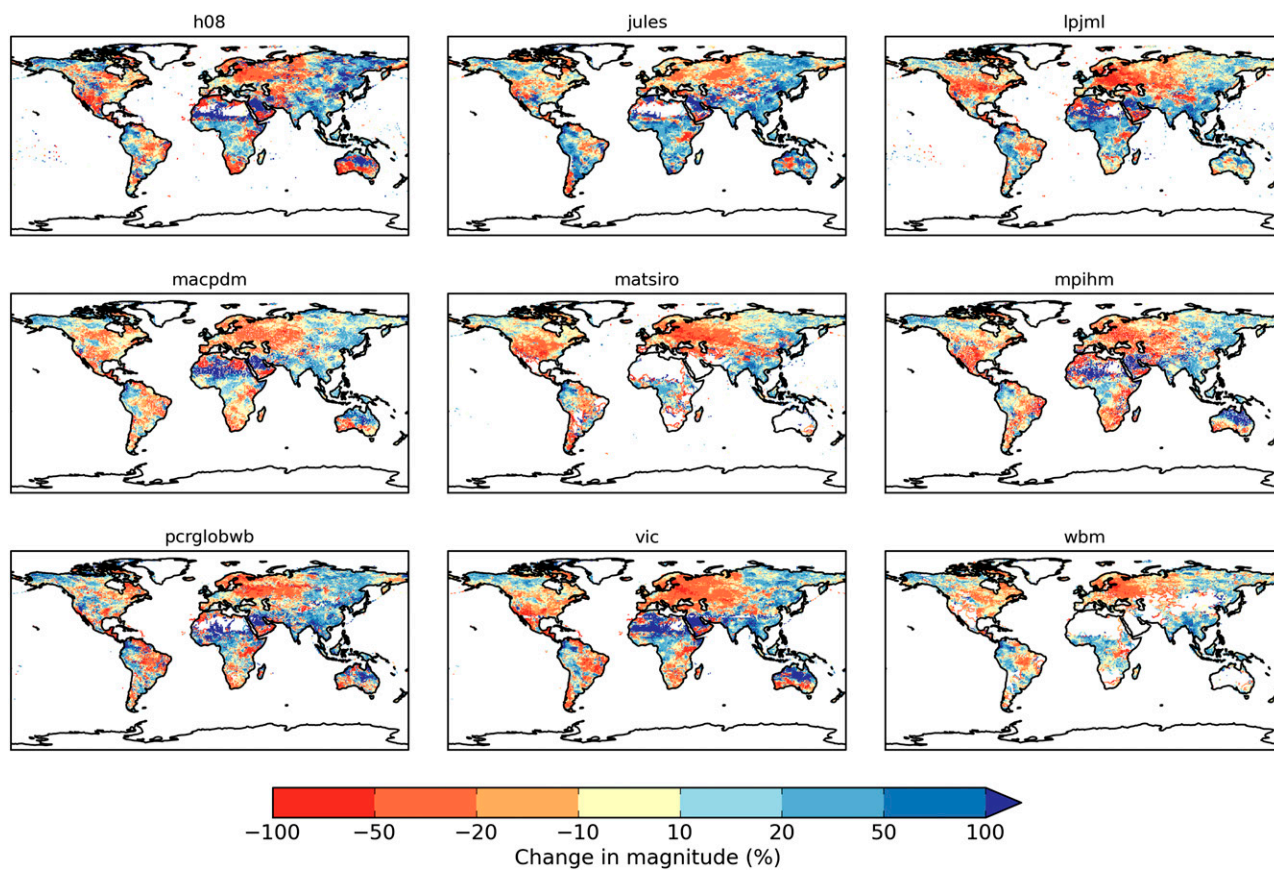

Fig. S5. Change in the magnitude of Q30 under future climate conditions (2070–2099; RCP8.5) for NorESM1-M simulations.

Future (2070-2099) recurrence of GEV 30-year return level for gfdl-esm2m

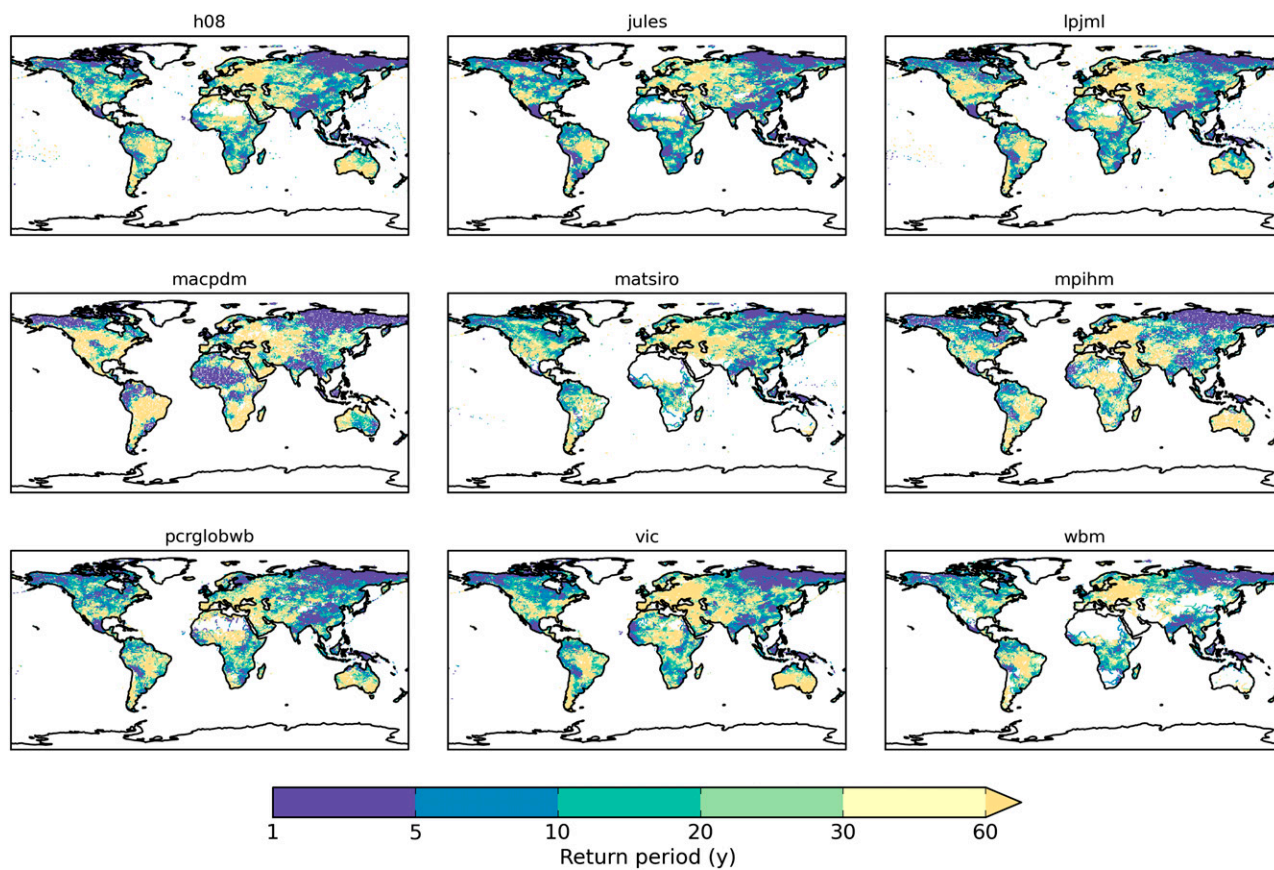

Fig. S6. Estimated future (2070–2099) return period of the historical (1971–2000) Q30 for GFDL-ESM2M simulations.

Future (2070-2099) recurrence of GEV 30-year return level for hadgem2-es

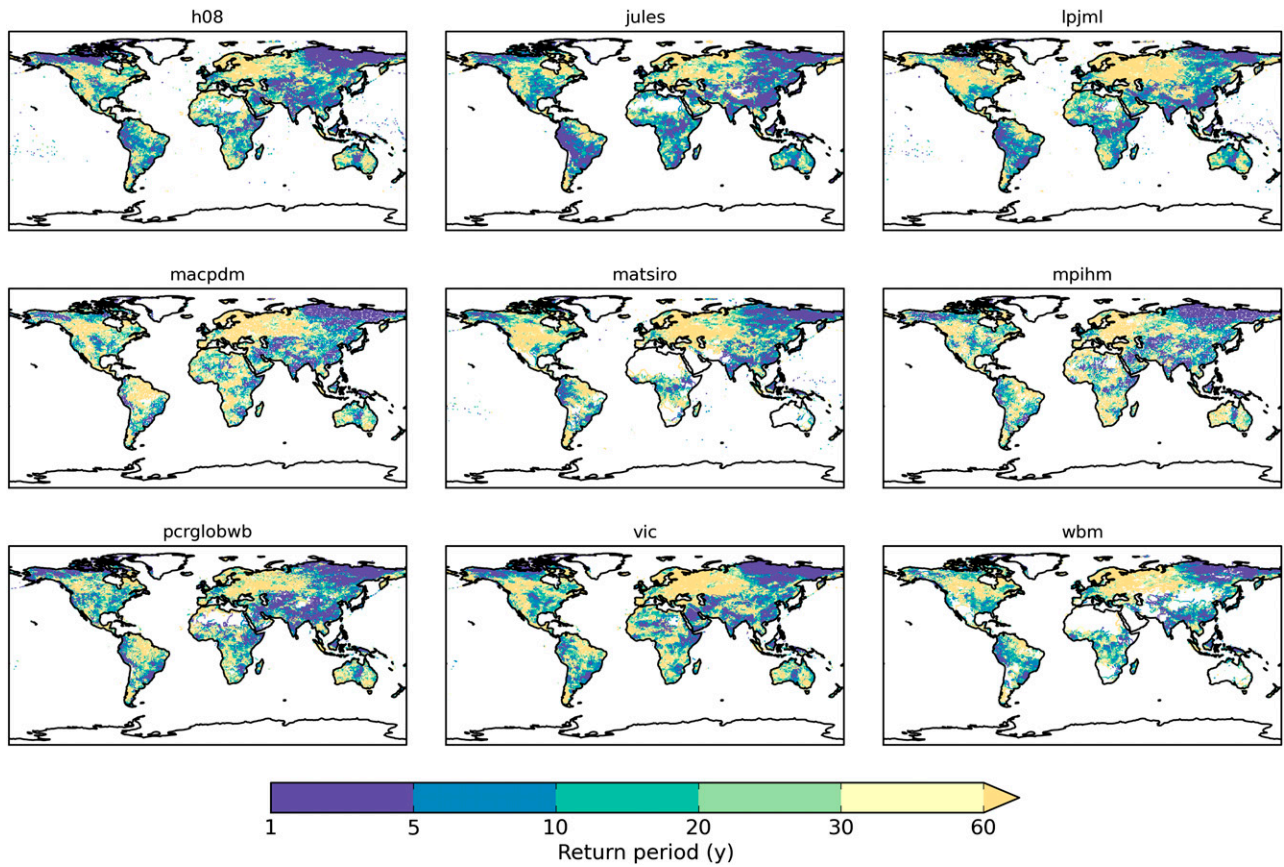

Fig. S7. Estimated future (2070–2099) return period of the historical (1971–2000) Q30 for HadGEM2-E5 simulations.

Future (2070-2099) recurrence of GEV 30-year return level for ipsl-cm5a-lr

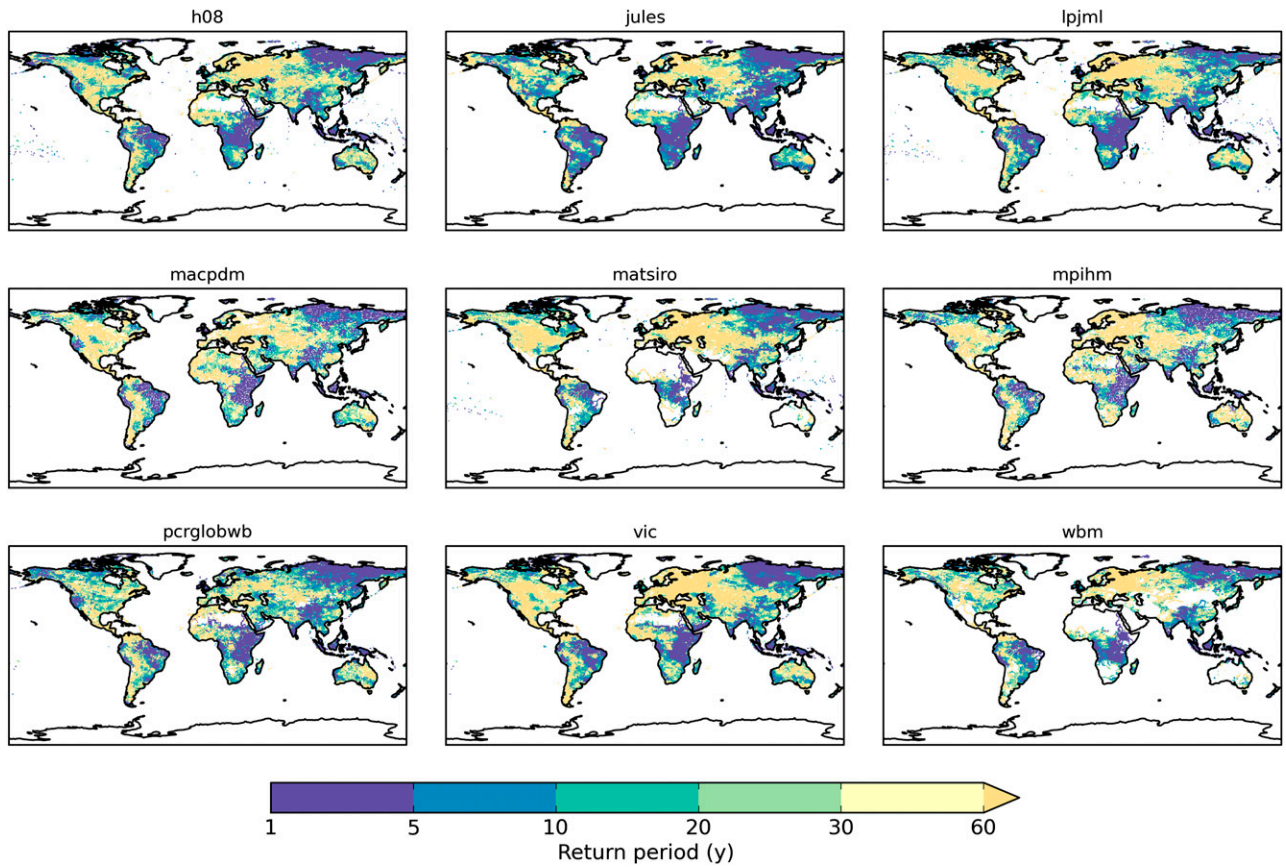

Fig. 58. Estimated future (2070–2099) return period of the historical (1971–2000) Q30 for IPSL-CM5A-LR simulations.



Future (2070-2099) recurrence of GEV 30-year return level for miroc-esm-chem

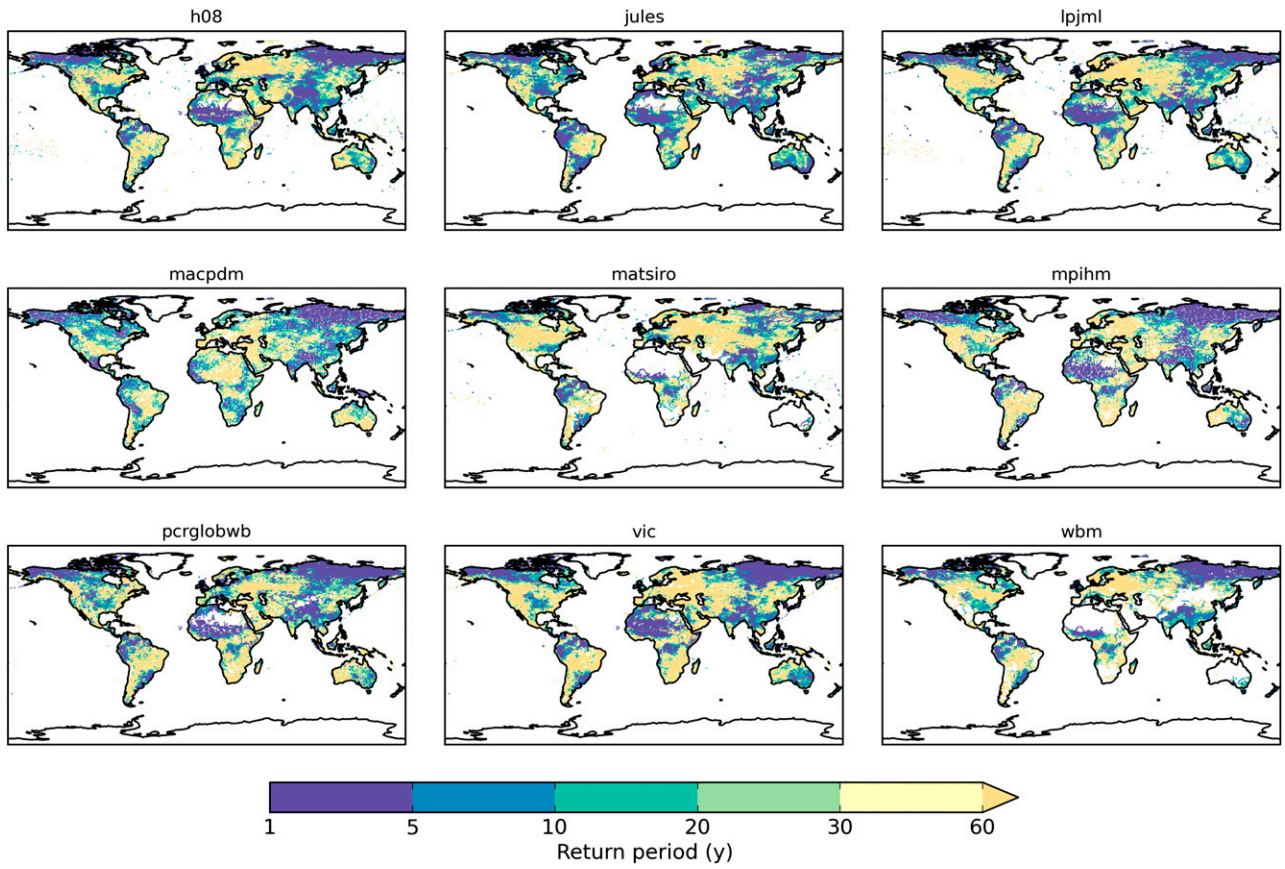

Fig. S9. Estimated future (2070–2099) return period of the historical (1971–2000) Q30 for MIROC-ESM-CHEM simulations.

Future (2070-2099) recurrence of GEV 30-year return level for noresm1-m

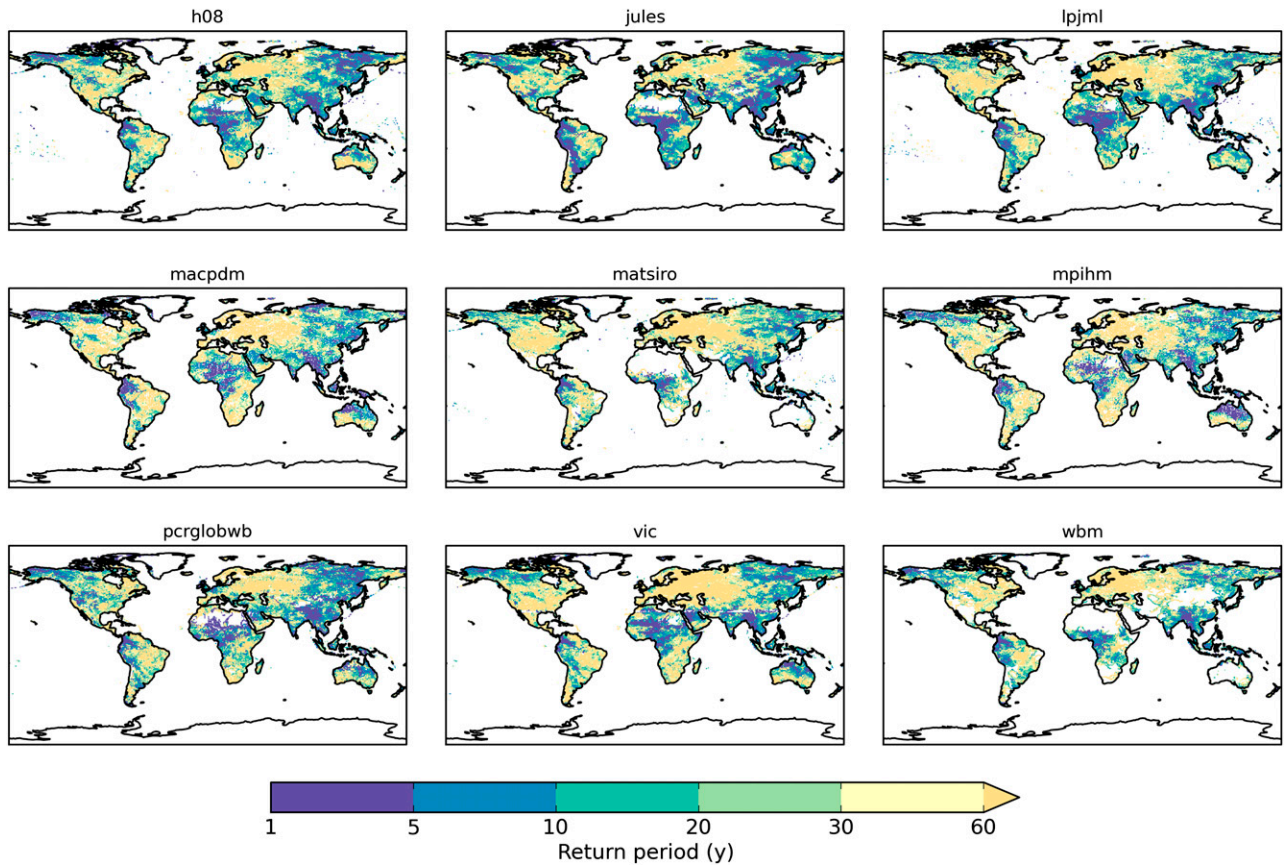

Fig. S10. Estimated future (2070–2099) return period of the historical (1971–2000) Q30 for NorESM1-M simulations.
